# Supplementary material for: X-ray absorption spectroscopy of archetypal chromium porphyrin and corrole derivatives
Source: Royal Society of Chemistry journal article supplement (doi:10.1039/d0ra02335c), 2020-01-01
Supplement: d0ra02335c1.pdf [file d0ra02335c1.pdf]

# X-ray Absorption Spectroscopy of Archetypal Chromium Porphyrin and Corrole Derivatives

Rui Cao,<sup>§</sup> Kolle E. Thomas,<sup>†</sup> Abhik Ghosh\*,<sup>†</sup> Ritimukta Sarangi\*,<sup>§</sup>

<sup>§</sup>Stanford Synchrotron Radiation Lightsource, SLAC National Accelerator Laboratory, Stanford University, Menlo Park, California 94025, USA;

<sup>†</sup> Department of Chemistry, UiT – The Arctic University of Norway, N-9037 Tromsø, Norway;

Email: [abhik.ghosh@uit.no](mailto:abhik.ghosh@uit.no) (A.G.), [ritis@slac.stanford.edu](mailto:ritis@slac.stanford.edu) (R.S).

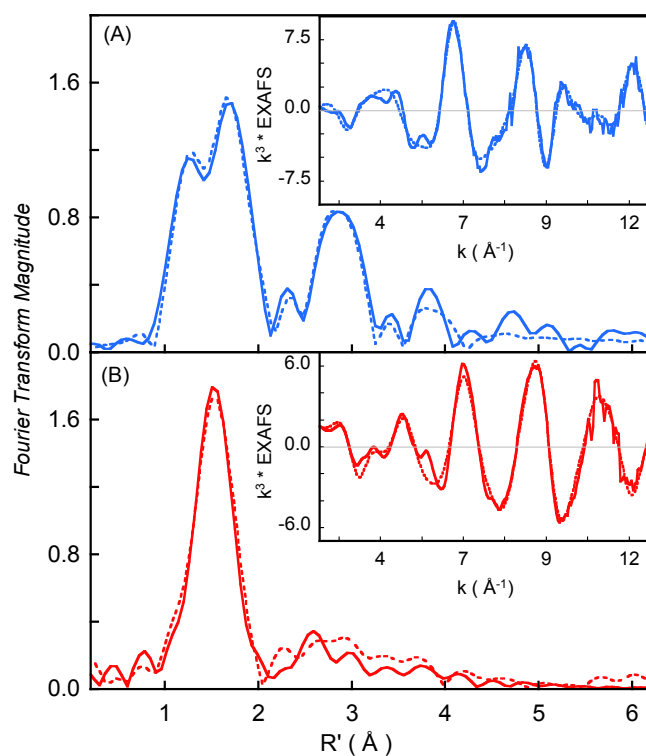

**Figure S1.** Non-phase-shift-corrected Fourier transform data and their corresponding FEFF best-fits for **2** (A) and **3** (B). The inset shows the Cr K-edge EXAFS fits. Data (solid), Fits (dashed).

## BP86 optimized geometries (Å)

### [Cr(TPP)O]

|    |                   |                   |                   |
|----|-------------------|-------------------|-------------------|
| Cr | -0.00723611393895 | 0.02691083320908  | -0.04413889048786 |
| O  | -0.43435643858489 | 0.05986382277651  | 1.45796789463855  |
| N  | -1.79710995516894 | 0.00919595737986  | -1.05467386897918 |
| C  | -2.58389246639765 | -1.09854576128412 | -1.34013448707380 |
| C  | -3.85308422378380 | -0.68564460587903 | -1.88243298259258 |
| C  | -3.85414749668977 | 0.67892519916766  | -1.90044344446035 |
| C  | -2.58477238395210 | 1.10780455807742  | -1.37121232901425 |
| C  | -2.22285941638932 | 2.45275703858491  | -1.21847544932661 |
| C  | -3.25061995598273 | 3.49951010734398  | -1.51671739078052 |
| C  | -3.14034039398821 | 4.31868560570190  | -2.65367410811630 |
| C  | -4.10640202357848 | 5.29190406326779  | -2.92671740917039 |
| C  | -5.19464500050043 | 5.46394222176306  | -2.06510211849004 |
| C  | -5.31336071254857 | 4.65509145601972  | -0.93030448614217 |
| C  | -4.35031900934014 | 3.67866445468622  | -0.65937839542720 |
| H  | -5.94742323002955 | 6.22523599918739  | -2.27782633526114 |
| N  | 0.12203455480660  | 2.02509353508610  | -0.53199289901611 |
| C  | -0.94831225931881 | 2.86370844247340  | -0.80999725288485 |
| C  | -0.56183023828542 | 4.24259045734321  | -0.64708435227947 |
| C  | 0.75582645411518  | 4.24743124846343  | -0.29251315613005 |
| C  | 1.18056832290910  | 2.87132906311632  | -0.23309087943094 |
| C  | 2.48720973813727  | 2.47000287263610  | 0.07062887720269  |
| C  | 3.51967113868898  | 3.52674411676026  | 0.31163987710408  |
| C  | 4.03825768922417  | 3.73855524357083  | 1.60107566233784  |
| C  | 5.00021880346301  | 4.72712252392319  | 1.82842811860228  |
| C  | 5.46209446561866  | 5.51605988847775  | 0.76984258758618  |
| C  | 4.95527032651604  | 5.31169955480050  | -0.51758364450097 |
| C  | 3.98998682843223  | 4.32615022824168  | -0.74472636439037 |
| H  | 6.21483835589222  | 6.28643794891942  | 0.94760252899248  |
| N  | 2.04635527128453  | 0.02375399587720  | 0.03267168062708  |
| C  | 2.88020736472576  | 1.12763130910126  | 0.15165025190693  |
| C  | 4.24075289799082  | 0.70694306712306  | 0.36918592052286  |
| C  | 4.23444497605562  | -0.65705911083023 | 0.41234353763336  |
| C  | 2.87052716814388  | -1.07798777102843 | 0.21852365010443  |
| C  | 2.46760647981692  | -2.41979685579569 | 0.21075611450819  |
| C  | 3.48984529781930  | -3.46737742905750 | 0.52519869283448  |
| C  | 3.98049743328391  | -3.61432766488894 | 1.83436628605254  |
| C  | 4.93374717390280  | -4.59266543947425 | 2.13207033809362  |
| C  | 5.41477895962804  | -5.43577755404087 | 1.12511871004950  |
| C  | 4.93611766172932  | -5.29585853729048 | -0.18161350765579 |
| C  | 3.97936219575978  | -4.32070630495844 | -0.47892109594674 |
| H  | 6.16059882180432  | -6.19824368495044 | 1.35763233879496  |
| N  | 0.11403929739205  | -1.99127616524308 | -0.44403300019105 |
| C  | 1.16281110430730  | -2.82847904386849 | -0.09001004901373 |
| C  | 0.73203435511836  | -4.20386987397013 | -0.09581578078238 |
| C  | -0.57841802286824 | -4.20884520406607 | -0.47625303251474 |
| C  | -0.95555210406757 | -2.83651767375183 | -0.70382251242868 |
| C  | -2.22396322603298 | -2.43817961520042 | -1.14280866445911 |
| C  | -3.24880399547353 | -3.49403256810997 | -1.41829339541431 |

|   |                   |                   |                   |
|---|-------------------|-------------------|-------------------|
| C | -4.35688956420009 | -3.64863586649018 | -0.56711521384947 |
| C | -5.31618341778261 | -4.63402204765959 | -0.81789027724589 |
| C | -5.18529469815629 | -5.47696870700260 | -1.92627005375430 |
| C | -4.08830989059324 | -5.33005944089704 | -2.78148028378811 |
| C | -3.12618658710126 | -4.34764655754253 | -2.52839139937017 |
| H | -5.93538154417095 | -6.24547796777497 | -2.12333469721306 |
| H | 3.67369509545660  | 3.12728925977586  | 2.42892331125891  |
| H | 5.38682881938830  | 4.88376198716322  | 2.83739713696979  |
| H | -4.63640923354650 | 1.34305470180348  | -2.25387852109814 |
| H | -6.15728823167962 | 4.78642502750936  | -0.25016110497947 |
| H | -2.29493142830862 | 4.18074881571024  | -3.33069752881279 |
| H | -4.63409731564778 | -1.36017984368876 | -2.21845840883824 |
| H | -4.00935808673488 | 5.91505615244379  | -3.81800524147444 |
| H | -4.44025440181220 | 3.05065355043160  | 0.22906736330496  |
| H | -1.22151962020908 | 5.09382149701064  | -0.78187530691510 |
| H | 1.38823476527030  | 5.10335955026962  | -0.07946049219787 |
| H | 5.09113078477849  | 1.37530429635159  | 0.45868784251314  |
| H | -4.45651815098407 | -2.99395120041812 | 0.30086049641584  |
| H | 3.59910457486058  | 4.16325572205805  | -1.75103359518899 |
| H | -3.98144536138708 | -5.98006622820042 | -3.65222286146007 |
| H | 3.61064313408810  | -4.20858629105908 | -1.50045150571473 |
| H | 5.29884422675330  | -4.69830976747139 | 3.15558118977095  |
| H | -2.27358702020324 | -4.22985329125408 | -3.20023664486851 |
| H | 5.31081922006935  | -5.94583833505112 | -0.97483091606843 |
| H | -6.16687148754906 | -4.74563343569686 | -0.14266193476657 |
| H | -1.23986091265202 | -5.06222508802921 | -0.58666562514503 |
| H | 3.60195837708728  | -2.95959576553637 | 2.62171224139035  |
| H | 5.31468489622345  | 5.91922313725049  | -1.35056084122496 |
| H | 1.35626872972818  | -5.05222587153294 | 0.16607714291540  |
| H | 5.07828985936859  | -1.32654194186344 | 0.54521394420461  |

### Cr[TPC]O

|    |                   |                   |                   |
|----|-------------------|-------------------|-------------------|
| Cr | 0.03441866778815  | 0.00369293802808  | -0.09769186242937 |
| O  | 0.09285325709998  | 0.11994945589199  | 1.47161331601390  |
| N  | 0.06378420714619  | -1.90288988432805 | -0.53374629699423 |
| N  | -1.86245763479165 | 0.15346519042796  | -0.55620713810810 |
| N  | 0.18742487517365  | 1.78201179773301  | -0.88714067162438 |
| N  | 1.86515687301411  | 0.01101430682093  | -0.76879795365904 |
| C  | 1.19273967298807  | -2.74189305142045 | -0.52532606634679 |
| C  | 0.74515864704908  | -4.08876101624731 | -0.32832962268819 |
| C  | -0.62483142357924 | -4.07696298001985 | -0.23525346675579 |
| C  | -1.06209775071685 | -2.71911043956250 | -0.36897502283176 |
| C  | -2.39220024483764 | -2.26565102086856 | -0.35569502930525 |
| C  | -2.75888169902782 | -0.91370736728578 | -0.48324865310382 |
| C  | -4.09036847665757 | -0.40008048237012 | -0.61258829592993 |
| C  | -4.00178598195000 | 0.96455012179449  | -0.74633608360585 |
| C  | -2.61601923540073 | 1.32719512472671  | -0.70713768578662 |
| C  | -2.09154806440537 | 2.62455223414134  | -0.87176277205692 |
| C  | -0.70592277041704 | 2.83406913932086  | -0.97920218492123 |
| C  | 0.05364983573291  | 4.02118457408085  | -1.23812046671324 |

|   |                   |                   |                   |
|---|-------------------|-------------------|-------------------|
| C | 1.39506408678372  | 3.66430582236599  | -1.32501928817481 |
| C | 1.46662479089184  | 2.26539473848863  | -1.10339252841782 |
| C | 2.43184971847060  | 1.23815282857674  | -1.06170547457858 |
| C | 3.81551945975993  | 1.05267227006923  | -1.31222790158386 |
| C | 4.07139158350217  | -0.30889589377814 | -1.18293536829740 |
| C | 2.84154228016717  | -0.96154982290812 | -0.84496748426134 |
| C | 2.52774504158127  | -2.32309527044577 | -0.68768760612282 |
| C | 3.62786589660432  | -3.32543532482691 | -0.71967796186149 |
| C | 4.67315954685392  | -3.26178965275100 | 0.22077050933516  |
| C | 5.71741438391028  | -4.18987307110969 | 0.19164431076003  |
| C | 5.73855576994724  | -5.19547222161225 | -0.78018312460287 |
| C | 4.70831780013302  | -5.26614962729789 | -1.72382955915085 |
| C | 3.66236709661251  | -4.34019850857258 | -1.69448573763108 |
| C | -3.48526275068482 | -3.27777857613871 | -0.22649756855848 |
| C | -3.72292643562727 | -4.21703172653261 | -1.24553930859998 |
| C | -4.74935404539969 | -5.15801439151379 | -1.12255086723433 |
| C | -5.55347064315909 | -5.17637392252863 | 0.02174915062249  |
| C | -5.32601820831699 | -4.24702999359095 | 1.04188345698158  |
| C | -4.30124765783109 | -3.30440759749854 | 0.91842739416998  |
| C | -3.01952442927652 | 3.78515716111383  | -0.97312589596661 |
| C | -3.87031753877149 | 4.11895106524423  | 0.09696207874756  |
| C | -4.73363122440710 | 5.21396614796067  | 0.00725581848641  |
| C | -4.76328710773362 | 5.99397001062792  | -1.15345031176693 |
| C | -3.92395270946802 | 5.67097976856387  | -2.22457984109005 |
| C | -3.05851795088747 | 4.57725740851673  | -2.13550299208191 |
| H | 4.65046593101401  | -2.48589432615772 | 0.98805851387425  |
| H | 6.51460875902589  | -4.13058983774928 | 0.93546404613315  |
| H | 6.55479148522969  | -5.91977890410380 | -0.80349745575324 |
| H | 4.72257747049476  | -6.04124626638743 | -2.49276388196670 |
| H | 2.86961218762849  | -4.38602878442532 | -2.44330228312721 |
| H | -3.10226855272900 | -4.19768949516869 | -2.14346853895363 |
| H | -4.92487931313830 | -5.87550667637699 | -1.92668020072698 |
| H | -6.35443982518958 | -5.91174052486251 | 0.11797315320518  |
| H | -5.94524382552734 | -4.25826993995027 | 1.94106116690978  |
| H | -4.11918599635724 | -2.58499079590484 | 1.71918103816829  |
| H | -3.83831841084227 | 3.51957264857567  | 1.00868084648071  |
| H | -5.38064847966728 | 5.46272562969778  | 0.85084934098106  |
| H | -5.43843053141724 | 6.84913955849590  | -1.22348389566771 |
| H | -3.94705255182514 | 6.26897186896984  | -3.13788311188307 |
| H | -2.41664002587913 | 4.31724246899419  | -2.97906879099251 |
| H | 1.40173730454789  | -4.95105859597839 | -0.26413236068789 |
| H | -1.28411866568535 | -4.92521093669777 | -0.07973214974069 |
| H | -4.98851741964517 | -1.00975008291206 | -0.62293582164519 |
| H | -4.81624361130123 | 1.66717041592439  | -0.89458970631000 |
| H | -0.36630405135799 | 5.01603603524305  | -1.35283509259812 |
| H | 2.23520081130044  | 4.32275426148804  | -1.52818535826933 |
| H | 4.52596727122317  | 1.82939039372961  | -1.58155357468814 |
| H | 5.02163053223489  | -0.81303837572928 | -1.33308382501742 |

**Cr[TPP]Cl**

|    |          |          |          |
|----|----------|----------|----------|
| Cr | -0.02115 | -0.05175 | 0.25108  |
| Cl | 0.08071  | -0.04171 | 2.48347  |
| N  | -0.06880 | -2.08015 | -0.01040 |
| N  | 1.98660  | -0.09103 | -0.12798 |
| N  | -0.00057 | 1.96709  | -0.05276 |
| N  | -2.05604 | -0.02040 | 0.06089  |
| C  | -1.18752 | -2.89660 | 0.07912  |
| C  | -0.78488 | -4.28064 | 0.11287  |
| C  | 0.57847  | -4.30443 | 0.04750  |
| C  | 1.02423  | -2.93514 | -0.02704 |
| C  | 2.37037  | -2.54565 | -0.08703 |
| C  | 2.80363  | -1.21281 | -0.14433 |
| C  | 4.18456  | -0.81337 | -0.25555 |
| C  | 4.20750  | 0.55129  | -0.28425 |
| C  | 2.83983  | 1.00097  | -0.20579 |
| C  | 2.44988  | 2.34818  | -0.20885 |
| C  | 1.11796  | 2.78318  | -0.14687 |
| C  | 0.71320  | 4.16512  | -0.22222 |
| C  | -0.65024 | 4.18886  | -0.15810 |
| C  | -1.09402 | 2.82176  | -0.04303 |
| C  | -2.44019 | 2.43329  | 0.02080  |
| C  | -2.87452 | 1.10041  | 0.06197  |
| C  | -4.25828 | 0.69846  | 0.11485  |
| C  | -4.27971 | -0.66621 | 0.14536  |
| C  | -2.90898 | -1.11316 | 0.12591  |
| C  | -2.51871 | -2.46019 | 0.14656  |
| C  | 3.41313  | -3.62143 | -0.09169 |
| C  | 4.18744  | -3.86647 | 1.05522  |
| C  | 5.15939  | -4.87142 | 1.05494  |
| C  | 5.37324  | -5.64311 | -0.09187 |
| C  | 4.60840  | -5.40591 | -1.23851 |
| C  | 3.63411  | -4.40298 | -1.23829 |
| C  | 3.52263  | 3.39122  | -0.28941 |
| C  | 3.87240  | 4.14062  | 0.84668  |
| C  | 4.87251  | 5.11505  | 0.77463  |
| C  | 5.53465  | 5.35556  | -0.43363 |
| C  | 5.19225  | 4.61584  | -1.57018 |
| C  | 4.19384  | 3.63957  | -1.49859 |
| C  | -3.47904 | 3.51286  | 0.04182  |
| C  | -3.69408 | 4.26969  | 1.20604  |
| C  | -4.66254 | 5.27784  | 1.22942  |
| C  | -5.42730 | 5.54529  | 0.08932  |
| C  | -5.21918 | 4.79857  | -1.07480 |
| C  | -4.25269 | 3.78840  | -1.09831 |
| C  | -3.59394 | -3.49897 | 0.24644  |
| C  | -4.25596 | -3.72134 | 1.46589  |
| C  | -5.25818 | -4.69127 | 1.56350  |
| C  | -5.61406 | -5.45019 | 0.44381  |
| C  | -4.96170 | -5.23510 | -0.77446 |
| C  | -3.95745 | -4.26705 | -0.87252 |
| H  | -1.46450 | -5.12362 | 0.18687  |

|   |          |          |          |
|---|----------|----------|----------|
| H | 1.23224  | -5.17067 | 0.05869  |
| H | 5.02655  | -1.49636 | -0.30621 |
| H | 5.07248  | 1.20298  | -0.35471 |
| H | 1.39194  | 5.00569  | -0.32636 |
| H | -1.30614 | 5.05261  | -0.20032 |
| H | -5.10328 | 1.37948  | 0.12334  |
| H | -5.14566 | -1.31978 | 0.17577  |
| H | 4.01608  | -3.26756 | 1.95181  |
| H | 5.74869  | -5.05371 | 1.95578  |
| H | 6.13236  | -6.42760 | -0.09154 |
| H | 4.77216  | -6.00110 | -2.13910 |
| H | 3.04047  | -4.21500 | -2.13526 |
| H | 3.35919  | 3.94806  | 1.79084  |
| H | 5.13718  | 5.68520  | 1.66733  |
| H | 6.31480  | 6.11709  | -0.48956 |
| H | 5.70118  | 4.80110  | -2.51823 |
| H | 3.92282  | 3.06625  | -2.38747 |
| H | -3.10032 | 4.05712  | 2.09725  |
| H | -4.82171 | 5.85364  | 2.14328  |
| H | -6.18259 | 6.33324  | 0.10777  |
| H | -5.80878 | 5.00433  | -1.97043 |
| H | -4.08681 | 3.20919  | -2.00896 |
| H | -3.97302 | -3.13274 | 2.34077  |
| H | -5.75956 | -4.85655 | 2.51918  |
| H | -6.39721 | -6.20681 | 0.52056  |
| H | -5.23701 | -5.82036 | -1.65414 |
| H | -3.45197 | -4.09541 | -1.82501 |
